# Supplementary material
Source: Springer Nature journal article supplement (https://www.springermedizin.de/resource/supplementary/12889_2012_4957_MOESM2_ESM.pdf/9495396)
Supplement: MOESM2 [file 9495396]

2045 Records identified through  
database searching

9 Records identified from National  
Reports

1861 Records after duplicates  
removed

1861 Records screened

66 Full-text articles assessed for  
eligibility

55 Full-text articles excluded due to:

- Did not describe structural intervention
- Biomarker data not presented
- Longitudinal data not available
- Sample is not all PWID
- Study did not come from a low or middle Income country

11 Studies included in qualitative  
synthesis
